# Supplementary material for: Somatic mutations of CADM1 in aldosterone-producing adenomas and gap junction-dependent regulation of aldosterone production
Source: Springer Nature journal article supplement (doi:10.1038/s41588-023-01403-0), 2023-06-01
Supplement: MOESM11 [file 41588_2023_1403_MOESM11_ESM.pdf]

Source data for Figure 3a

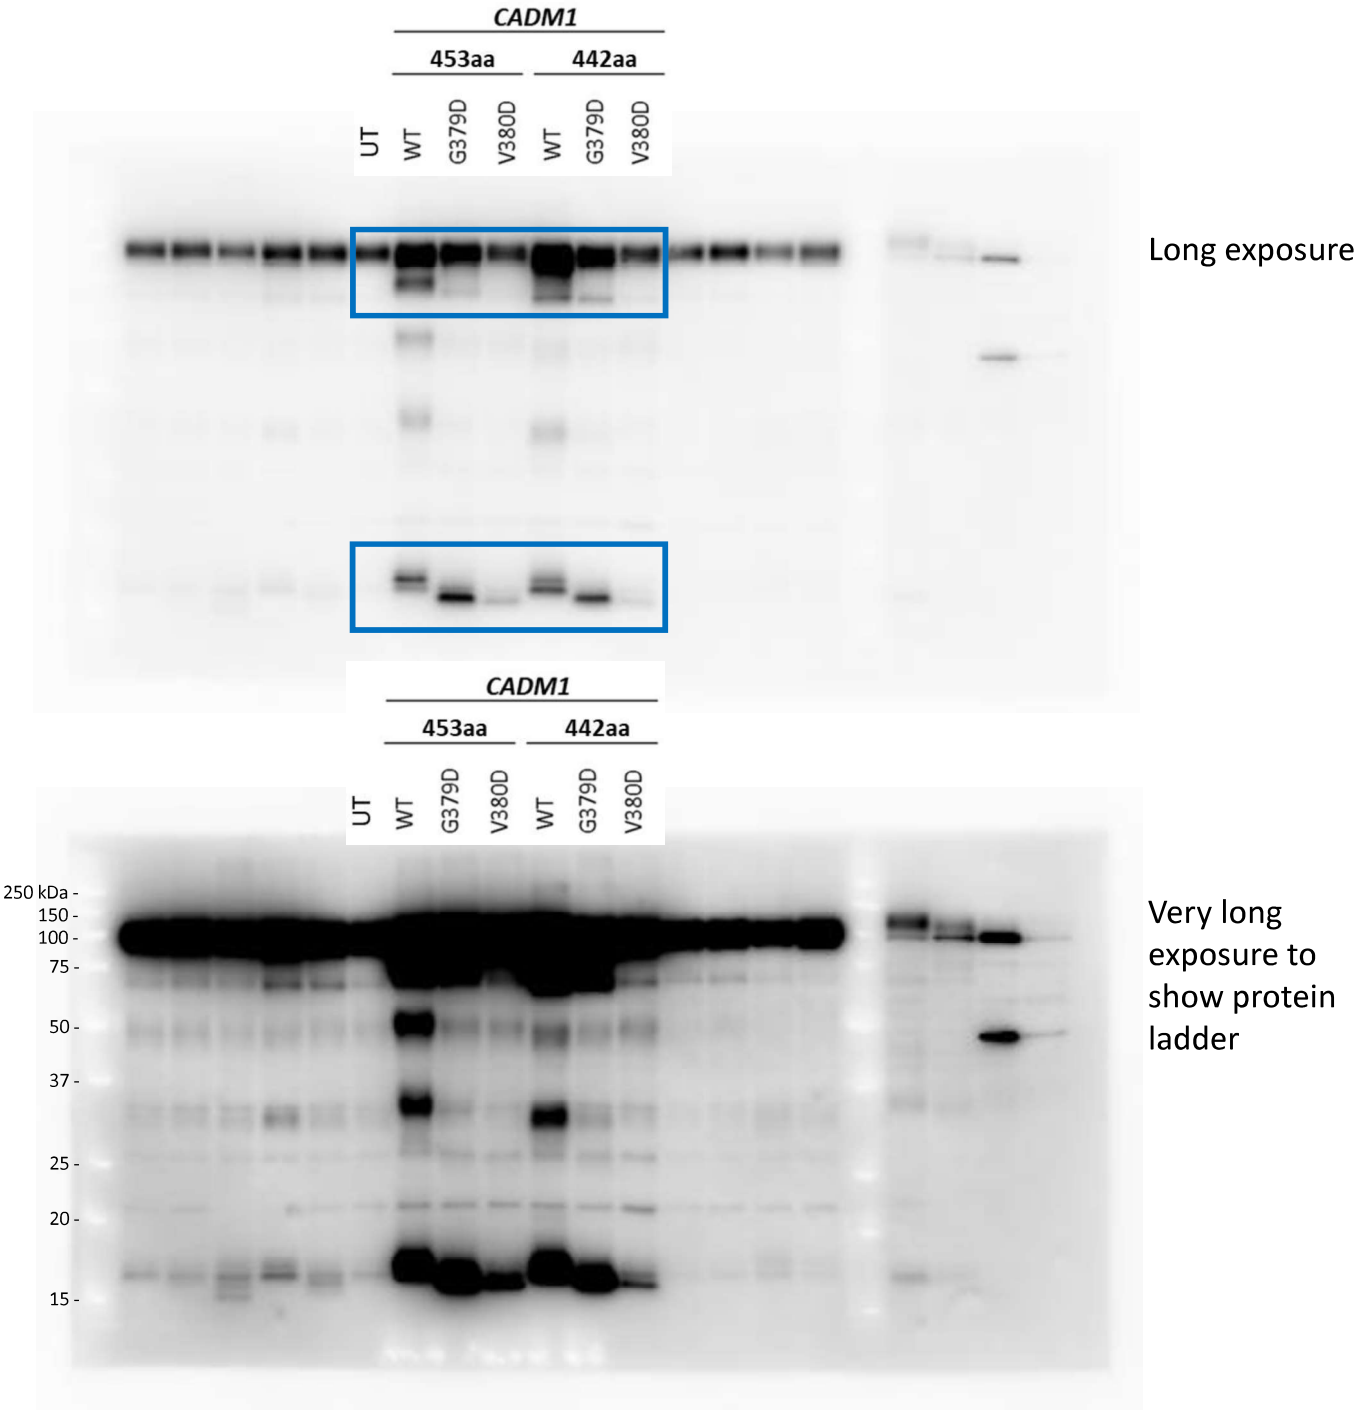

Cell lysates were immunoblotted with a custom-made anti-CADM1 C-terminal antibody.

Areas of Western Blot cropped and shown in **Figure 3a** are highlighted by the blue boxes respectively.
